# Supplementary material
Source: PubMed Central journal article supplement (PMC5679435)
Supplement: NIHMS904272-supplement-7.pdf [file NIHMS904272-supplement-7.pdf]

**A** Day 47 human forebrain organoid

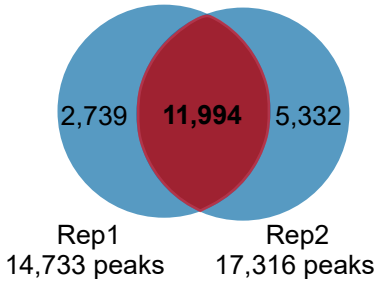

**B** PCW11 human brain

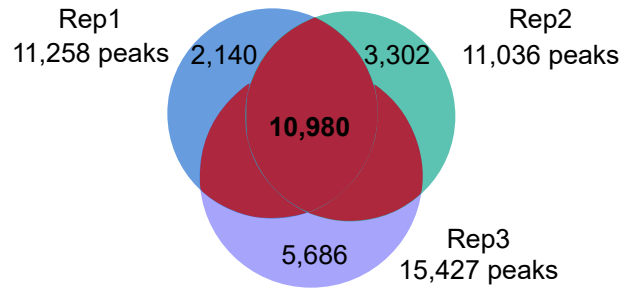

**C**

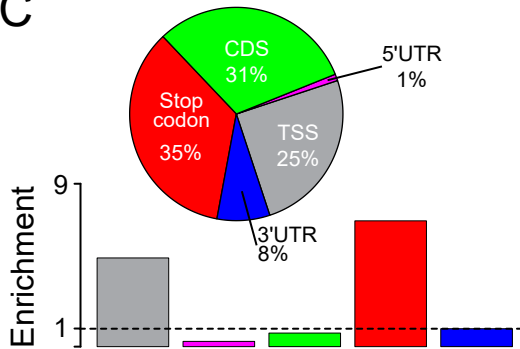

**D**

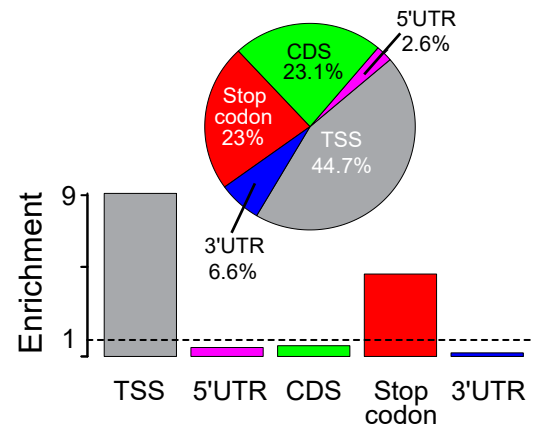

**E** Mouse E13.5 forebrain

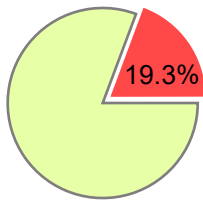

Day 47 human forebrain organoid

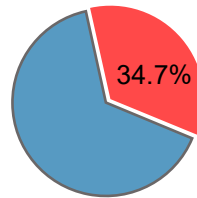

PCW11 human brain

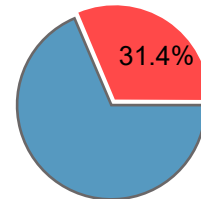

**F** GO Biological process:  
unique to human

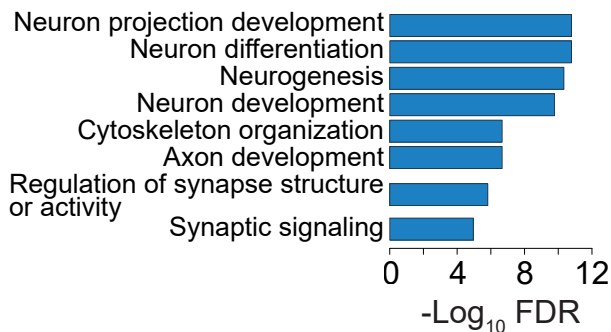

GO Biological process:  
human and mouse shared

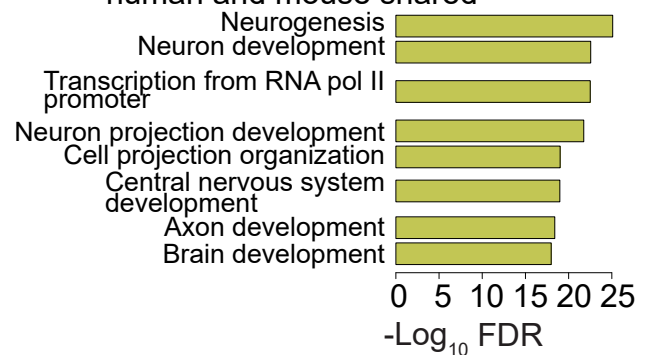

Figure S7
