# Supplementary material
Source: PubMed Central journal article supplement (PMC5679435)

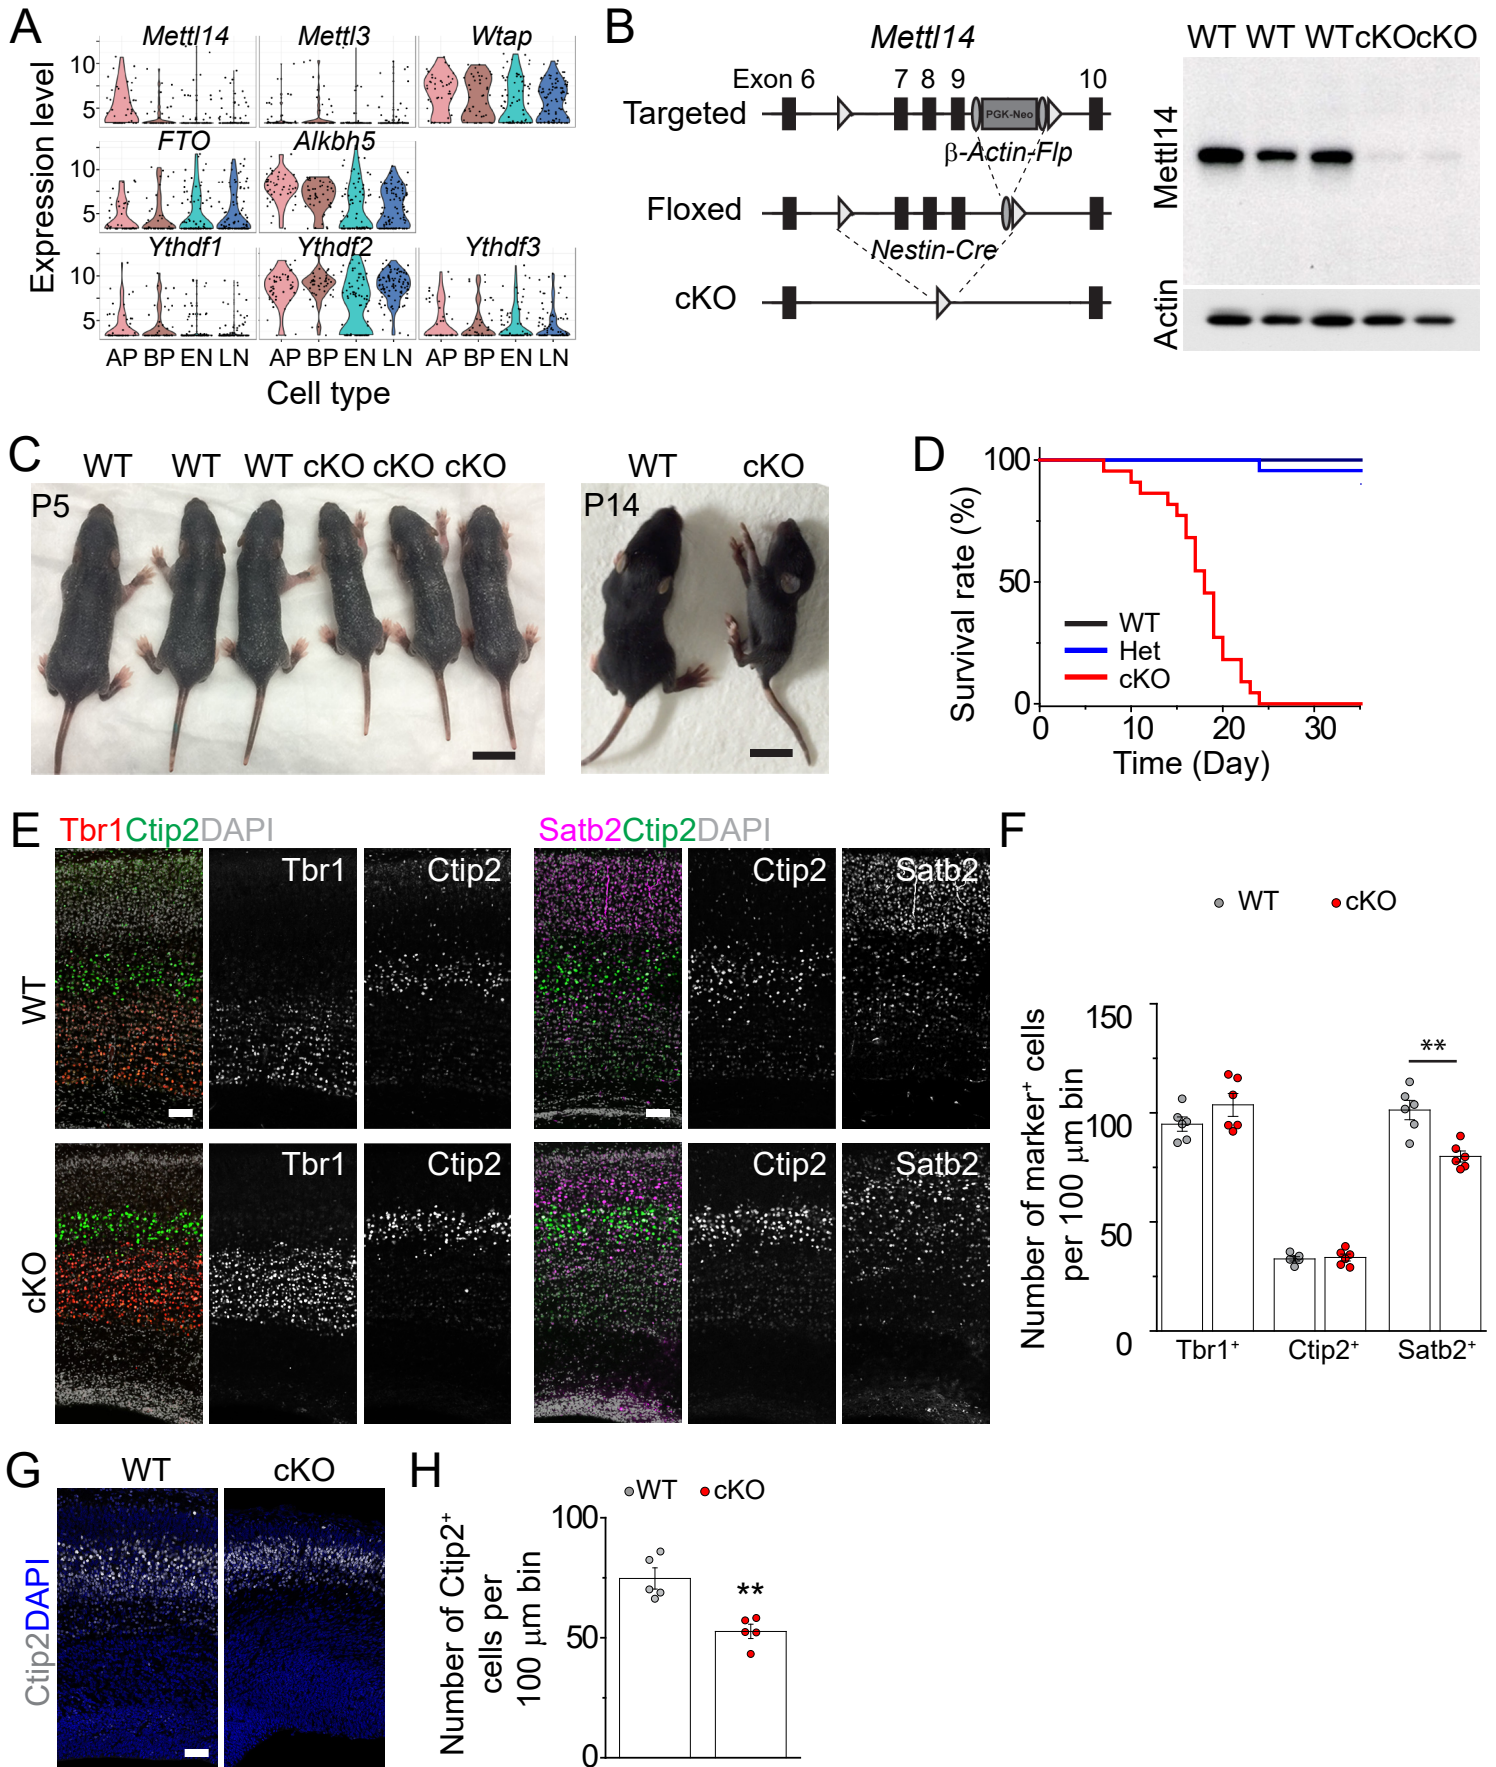

Figure S1

Supplement: NIHMS904272-supplement-1.pdf [file NIHMS904272-supplement-1.pdf]

**A** Molecular sensor      Cell cycle progression

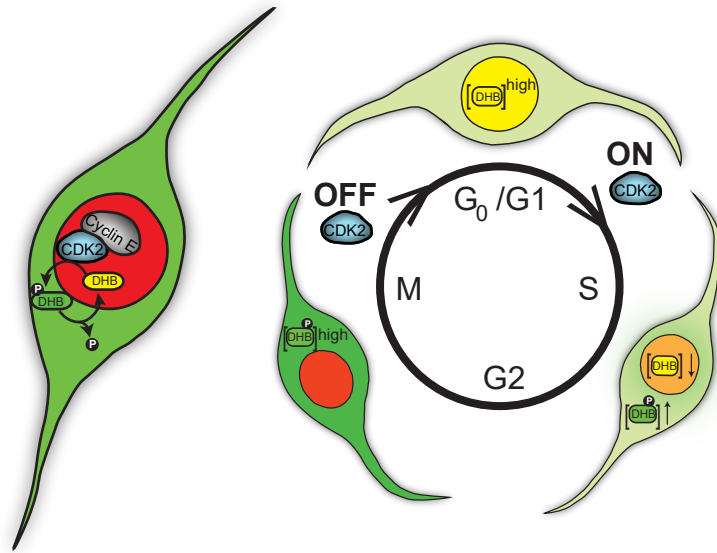

**B**

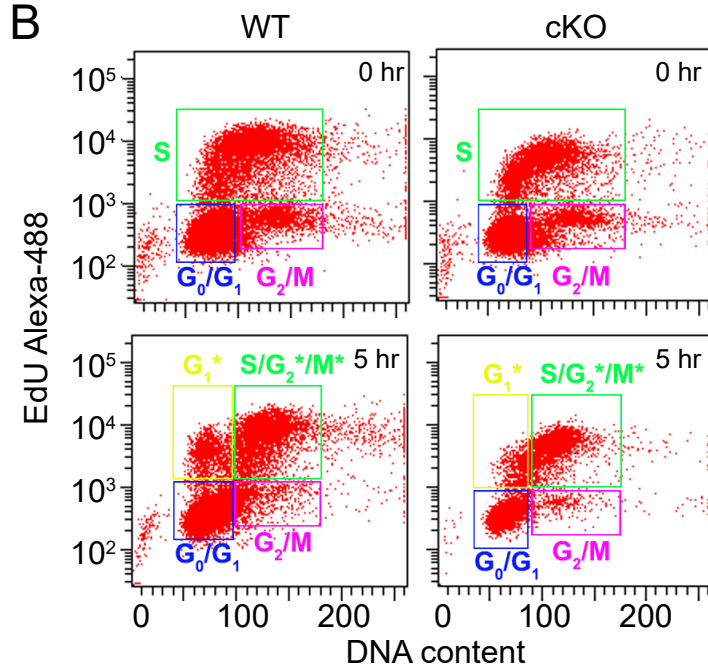

**C**

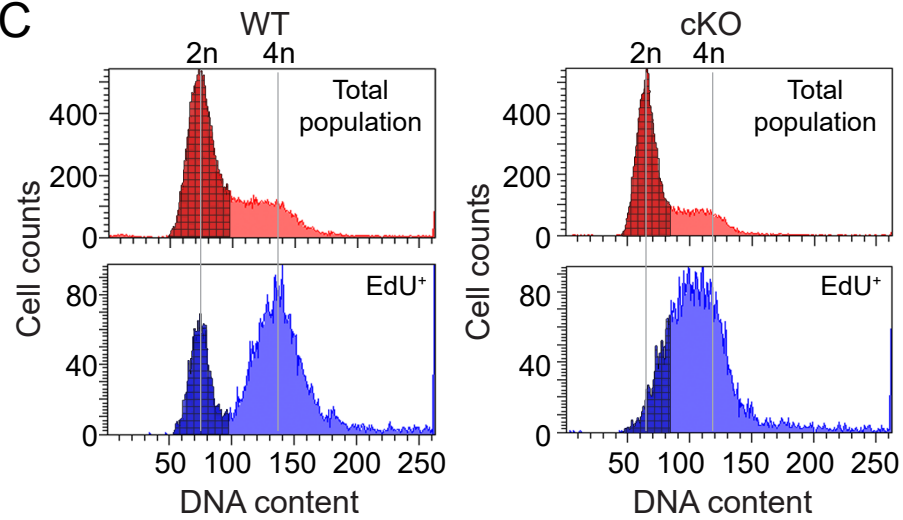

**D**

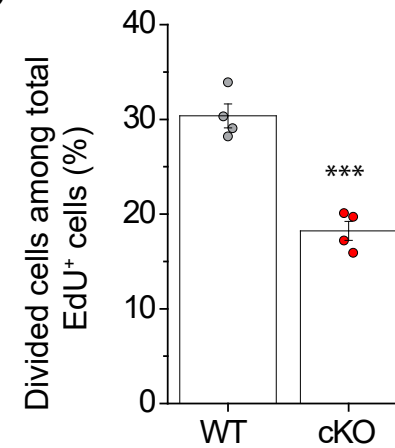

Figure S2

Supplement: NIHMS904272-supplement-2.pdf [file NIHMS904272-supplement-2.pdf]

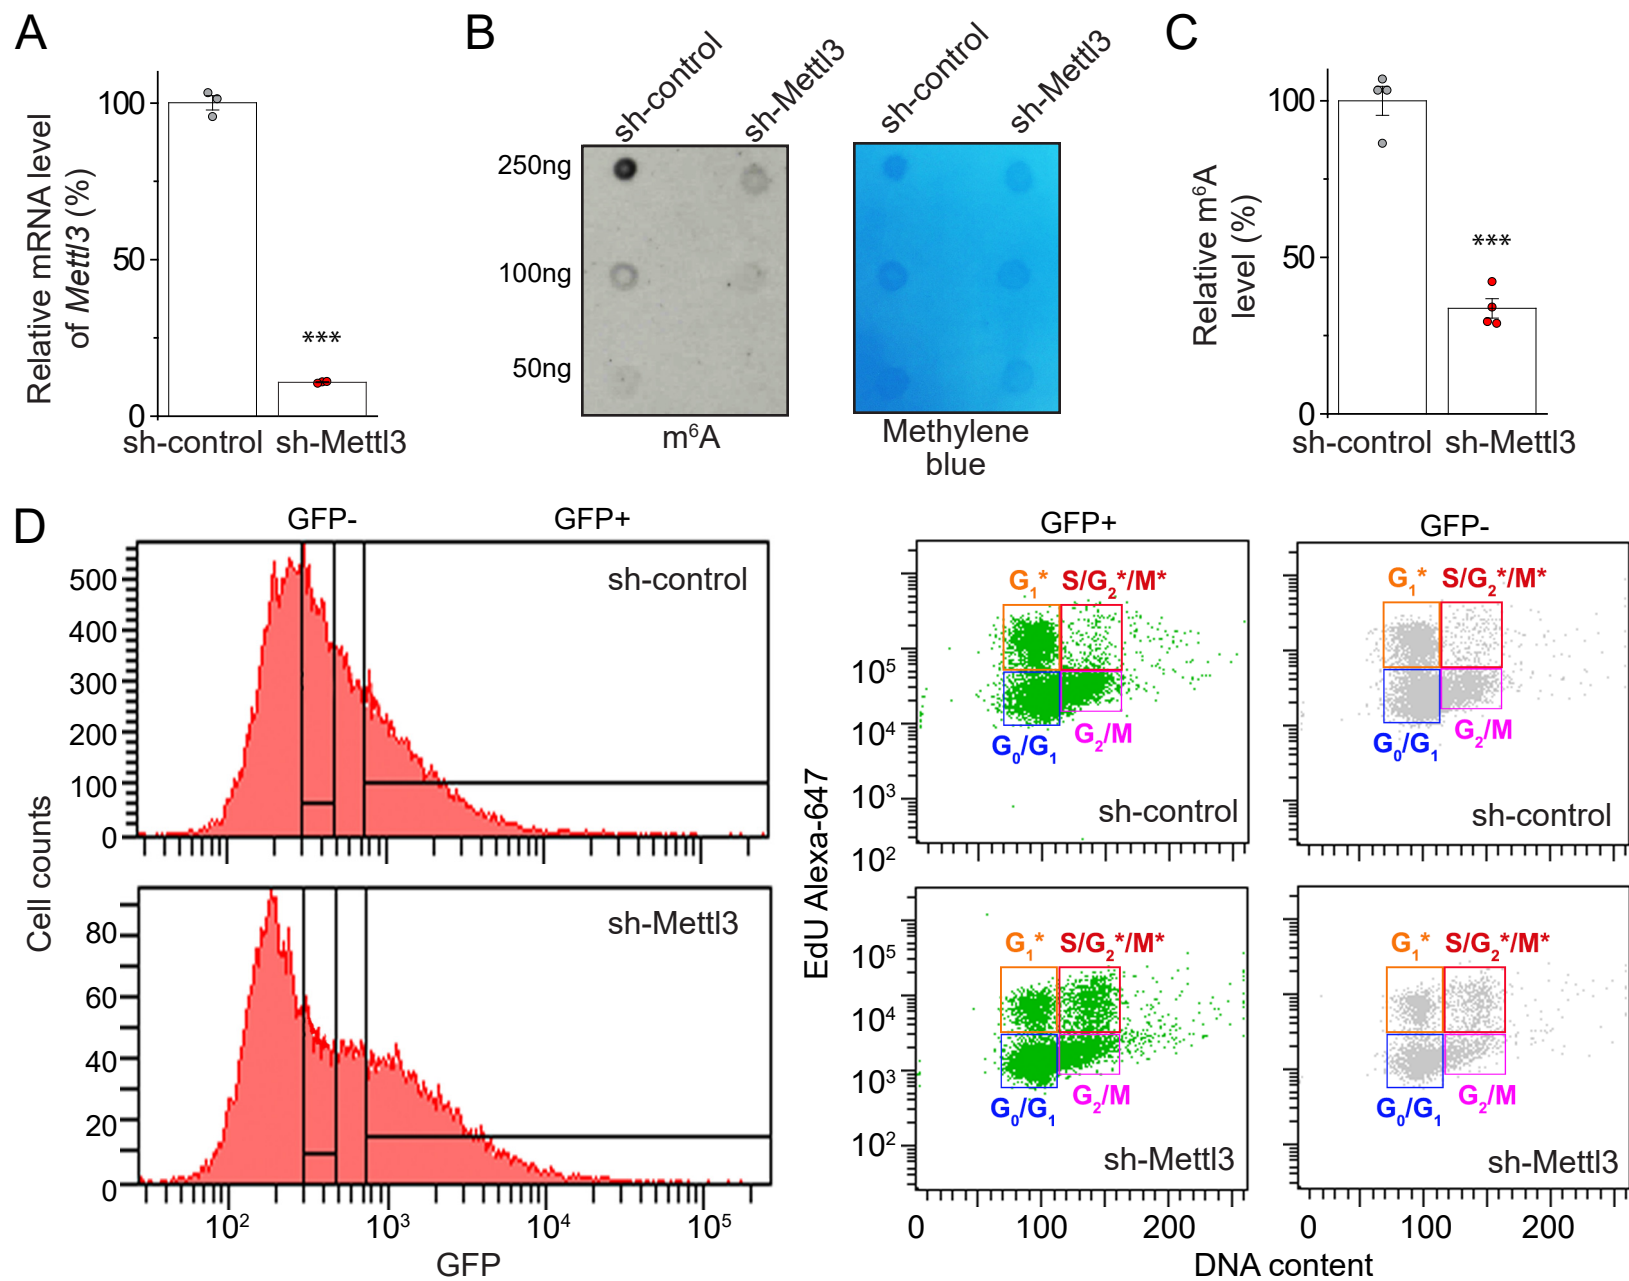

Figure S3

Supplement: NIHMS904272-supplement-3.pdf [file NIHMS904272-supplement-3.pdf]

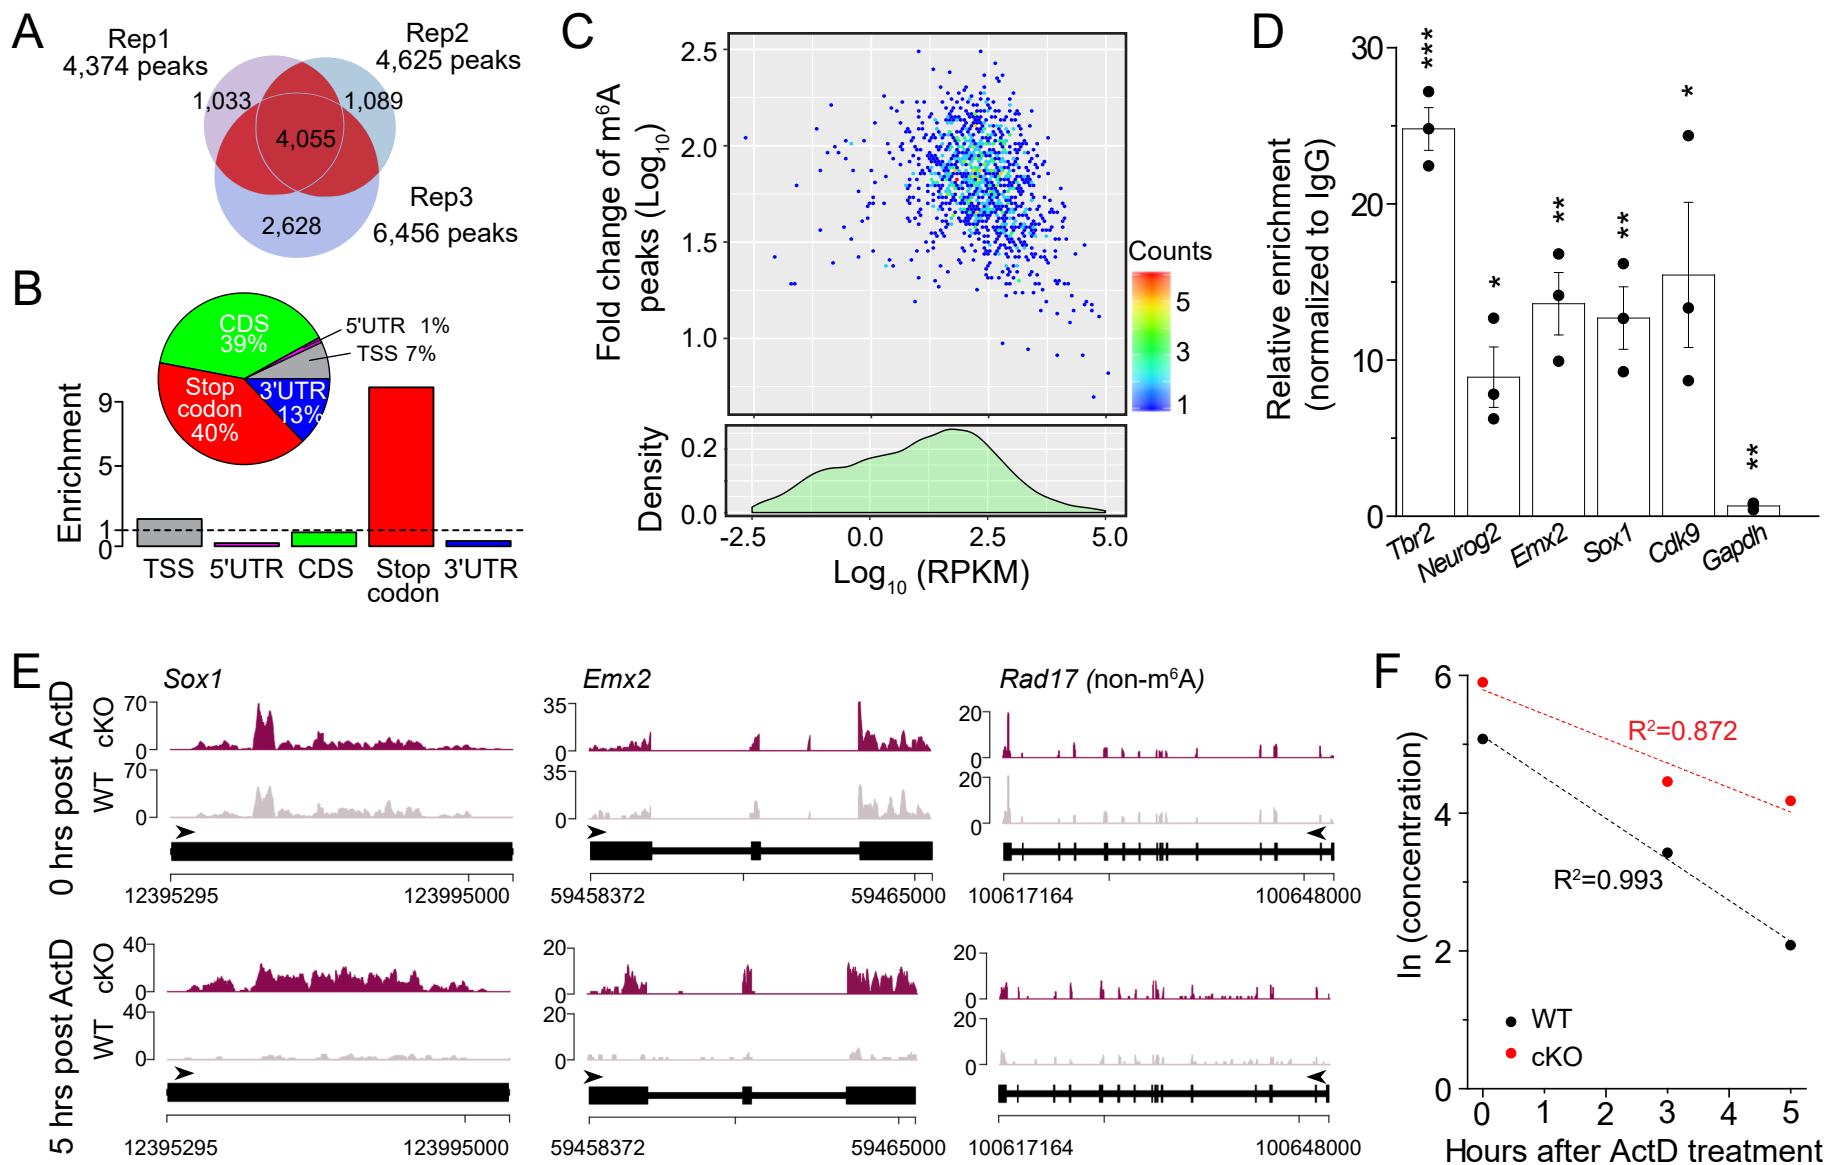

Figure S4

Supplement: NIHMS904272-supplement-4.pdf [file NIHMS904272-supplement-4.pdf]

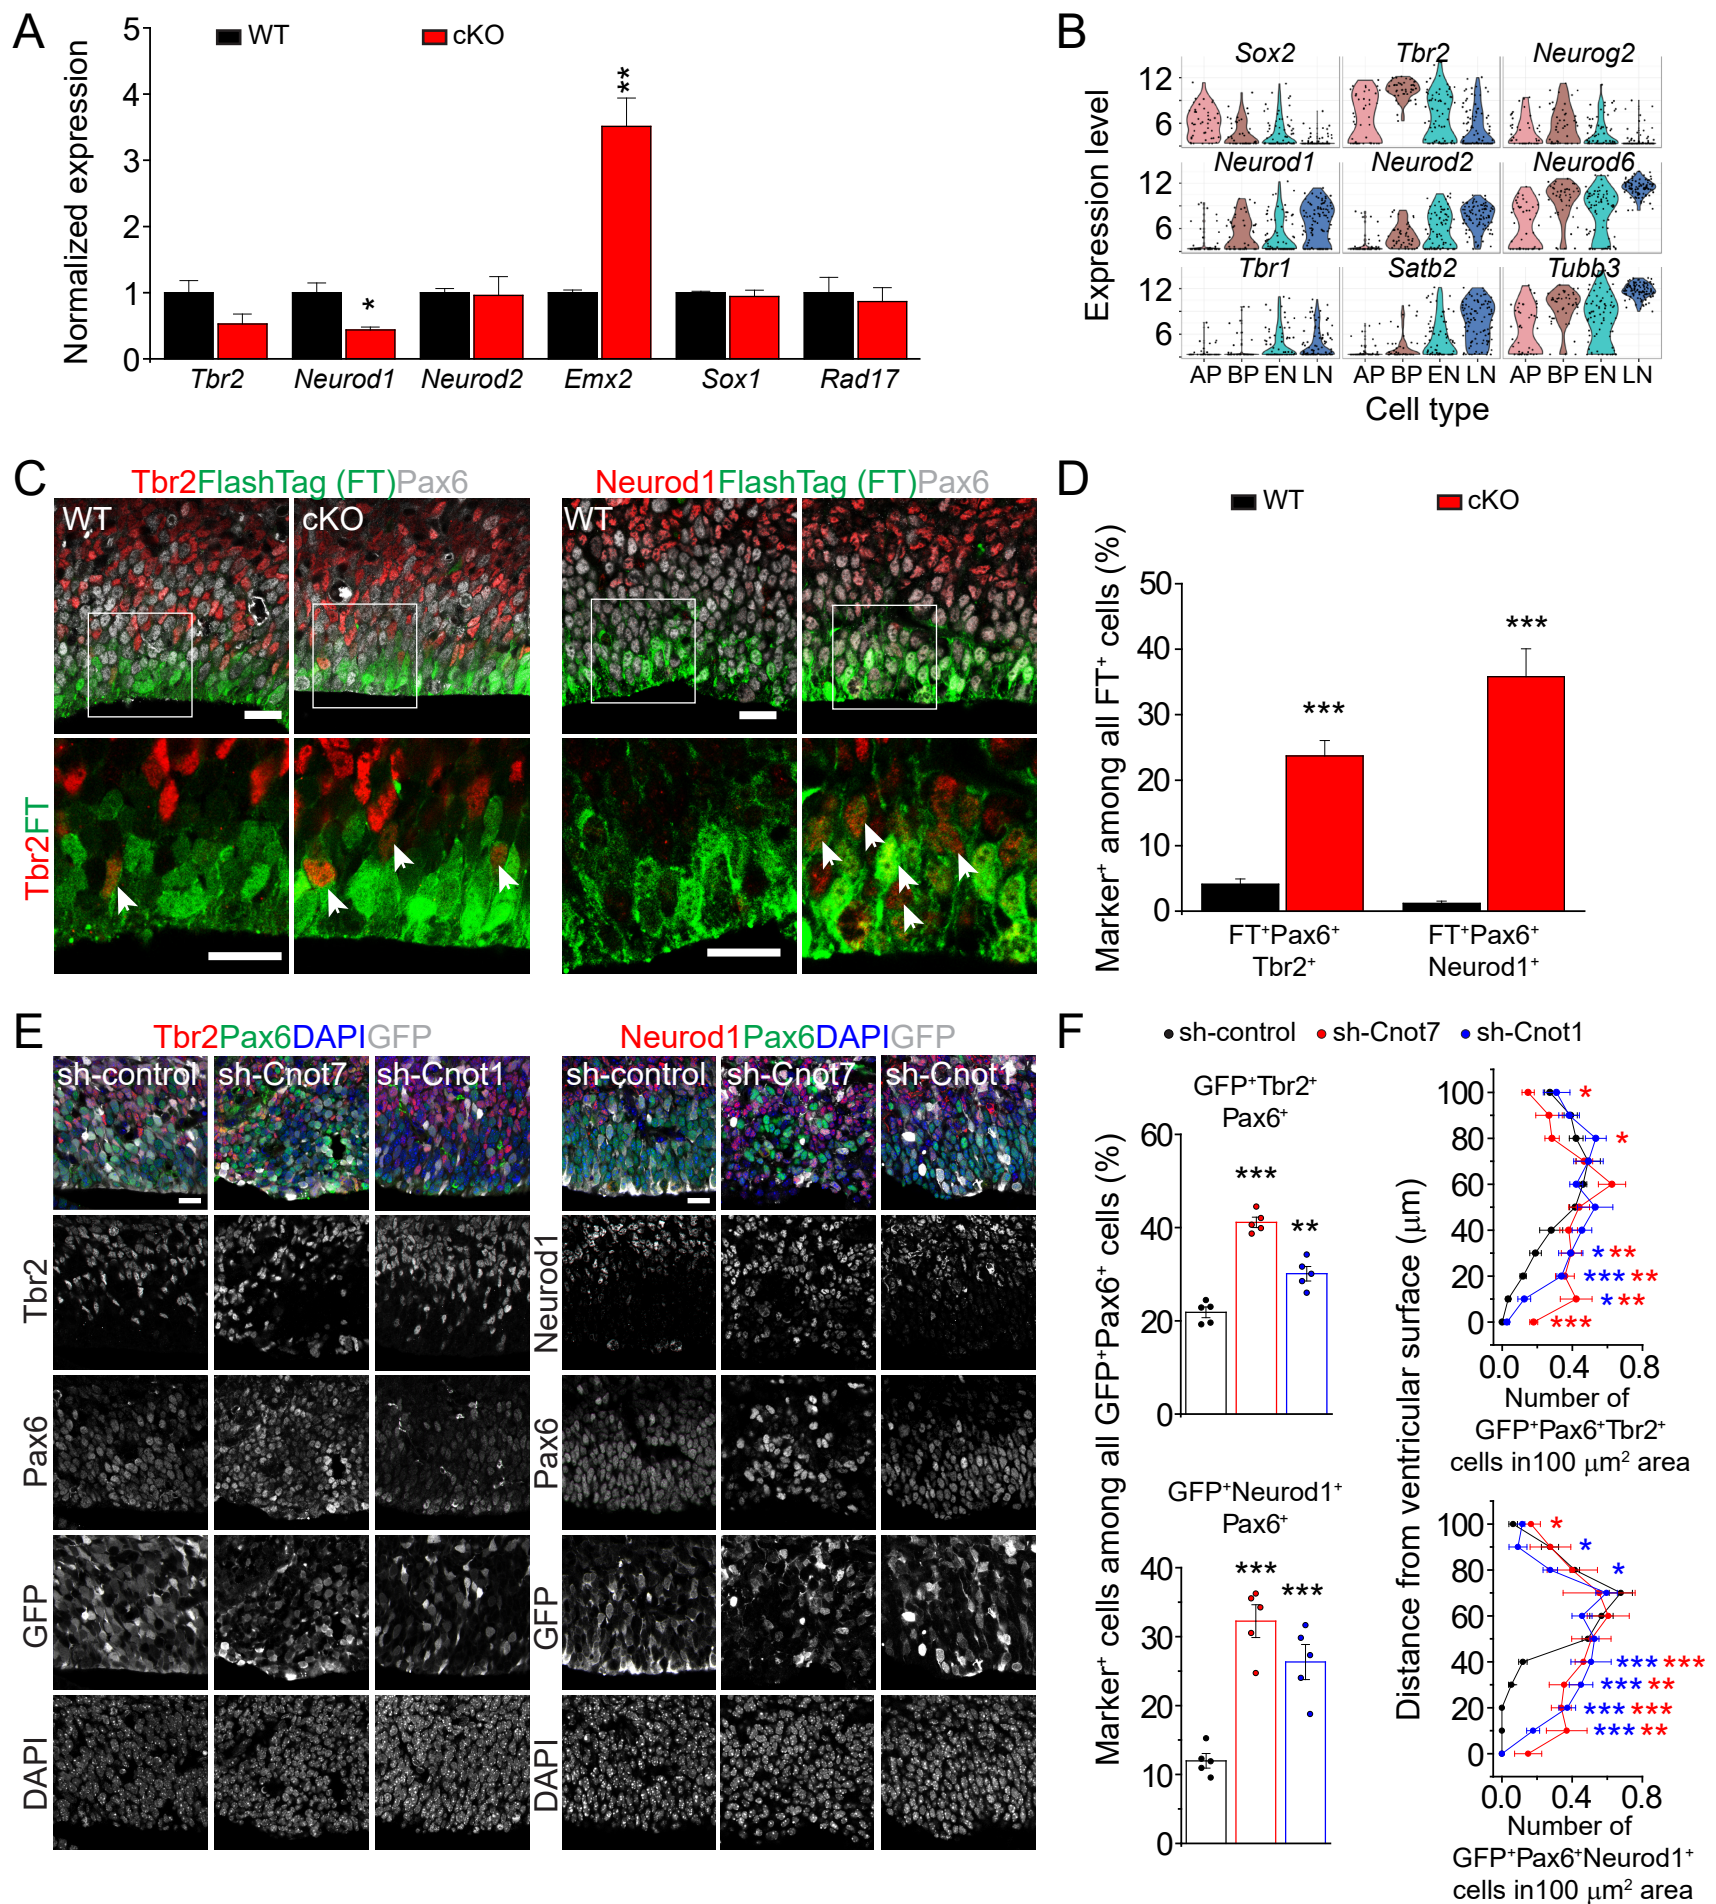

Figure S5

Supplement: NIHMS904272-supplement-5.pdf [file NIHMS904272-supplement-5.pdf]

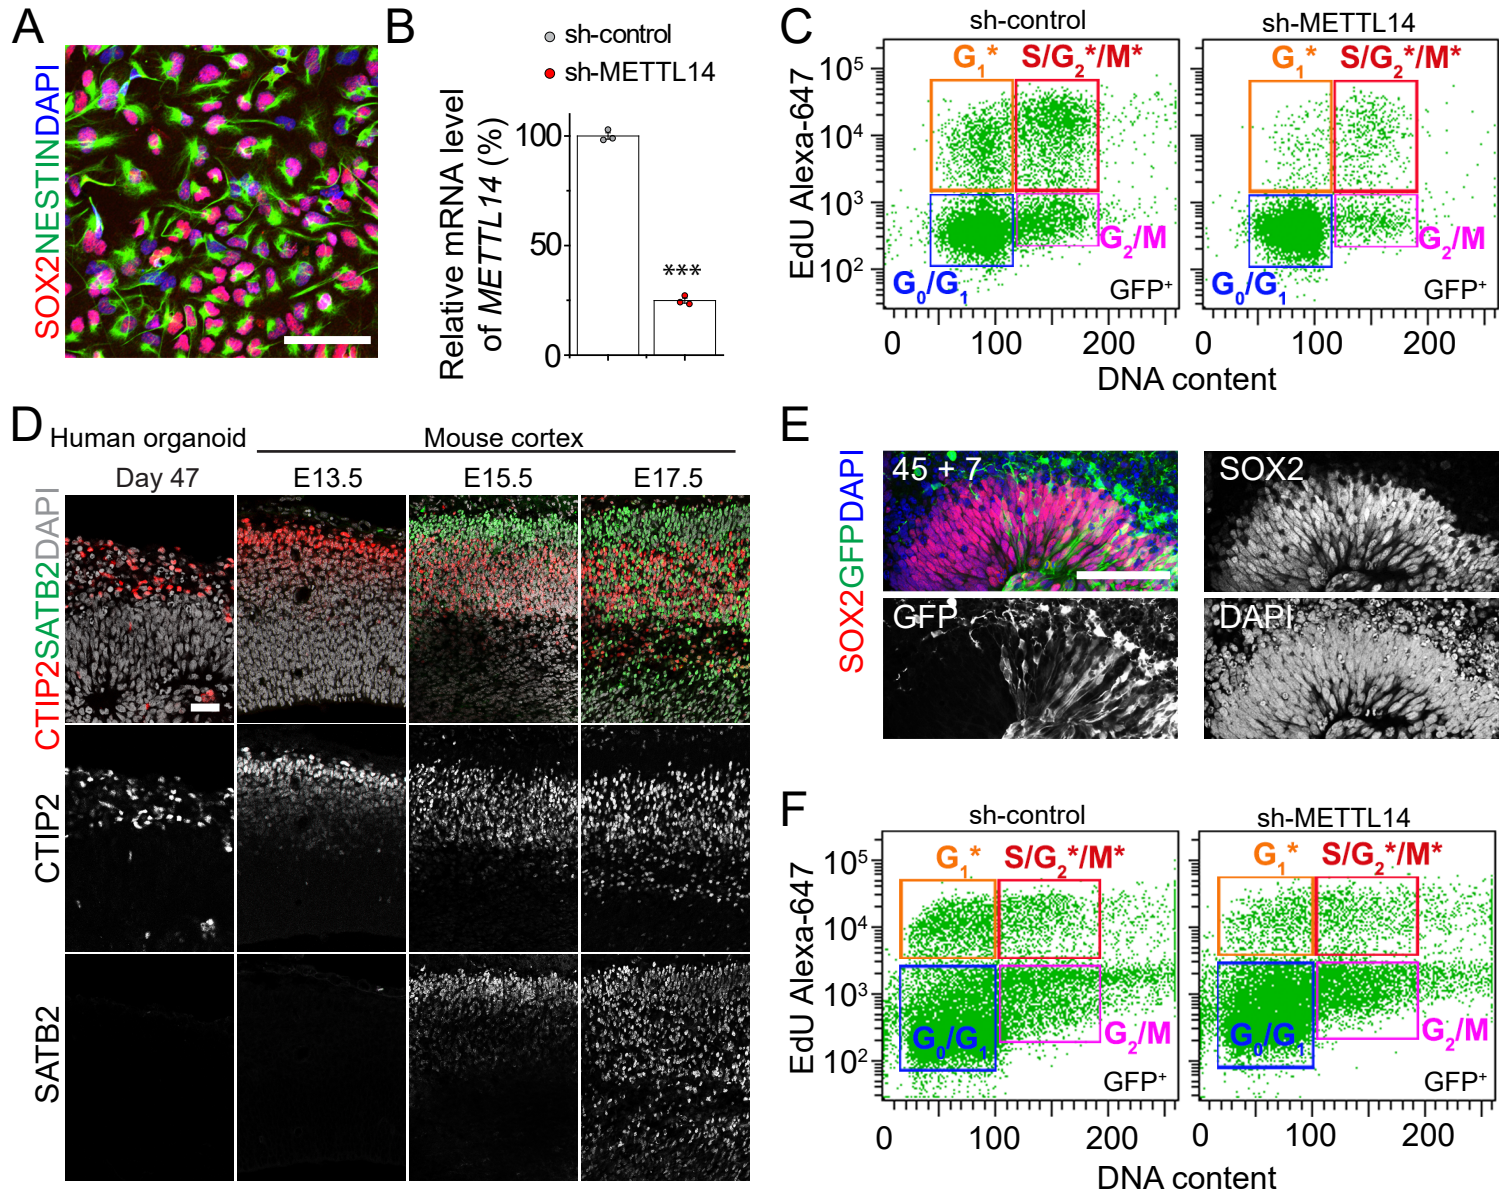

Figure S6

Supplement: NIHMS904272-supplement-6.pdf [file NIHMS904272-supplement-6.pdf]
